# Supplementary material for: Addendum to: The Mobile Insulin Titration Intervention (MITI) for Insulin Glargine Titration in an Urban, Low-Income Population: Randomized Controlled Trial Protocol
Source: PubMed Central journal article supplement (PMC6318147; doi:10.2196/resprot.5403), 2015-12-21
Supplement: resprot_v4i4e138_app2.pdf [file resprot_v4i4e138_app2.pdf]

## Insulin glargine titration algorithm

### *Guidelines for weekly titration*

- Titration typically occurs on Thursdays.
- Titration is restricted by the lowest fasting blood glucose value.
- Patients with a lowest fasting blood glucose value  $\leq 200$  need at least 3 values from the current week (Monday to Thursday) to change the dose.
- Patients with a lowest fasting blood glucose value  $> 200$  need at least 2 values from the current week (Monday to Thursday) to change the dose.

| Fasting blood glucose values (mg/dL) | Increase/decrease in insulin dose (IU) |
|--------------------------------------|----------------------------------------|
| $> 220$                              | + 5                                    |
| 181 - 220                            | + 4                                    |
| 151 - 180                            | + 3                                    |
| 131 - 150                            | + 2                                    |
| 80 - 130                             | 0                                      |
| 75 – 79                              | - 1                                    |
| $< 75$                               | - 2                                    |

< 65

- 4

Severe hypoglycemia requiring  
assistance from others or < 60

- 6
